# Supplementary material for: Anaerobic Digestion of Tetracycline Spiked Livestock Manure and Poultry Litter Increased the Abundances of Antibiotic and Heavy Metal Resistance Genes
Source: PubMed Central journal article supplement (PMC7775313; doi:10.3389/fmicb.2020.614424), 2020-12-18
Supplement: Table_1.pdf [file Table_1.pdf]

Supplementary Table 1. Primer sequences used for quantification of antibiotic and heavy metal resistance and bacterial marker genes from livestock manure and poultry litter under anaerobic digestion system.

| Target gene      | Primer       | Primer sequence (5'-3') <sup>†</sup> | T <sub>m</sub> (°C) <sup>‡</sup> | size (bp) <sup>§</sup> | Reference                                         |
|------------------|--------------|--------------------------------------|----------------------------------|------------------------|---------------------------------------------------|
| 16S rRNA         | 16S-1055-F   | ATG GCT GTC GTC AGC T                | 58.0                             | 337                    | (Harms et al., 2003)                              |
| Enterococci      | 16S-1392-R   | ACG GGC GGT GTG TAC                  | 60.0                             | 106                    | (Frahm and Obst, 2003)                            |
|                  | 16S-Probe-F  | FAM-CAA CGA GCG CAA CCC-BHQ          |                                  |                        |                                                   |
|                  | ECST748F     | AGAAATTCCAAACGAACTTG                 |                                  |                        |                                                   |
|                  | ENC854R      | CAGTGCTCTACCTCCATCATT                |                                  |                        |                                                   |
| <i>E. coli</i>   | ENT813probe  | TGGTTCTCTCCGAAATAGCTTTAGGGCTA        | 60.0                             | 82                     | (Frahm and Obst, 2003)                            |
|                  | uid784 F     | GTGTGATATCTACCCGCTTCGC               |                                  |                        |                                                   |
|                  | uid866 R     | AGAACGCTTTGTGGTTAATCAGGA             |                                  |                        |                                                   |
| <i>S. aureus</i> | uid807 probe | TCGGCATCCGGTCAGTGGCAGT               | 55.0                             | 255                    | (Poulsen et al., 2003)                            |
|                  | nuc-F        | TCAGCAAATGCATCACAAACAG               |                                  |                        |                                                   |
|                  | nuc-R        | CGTAAATGCACTTGCTTCAGG                |                                  |                        |                                                   |
| <i>tet(A)</i>    | tetA-F       | GCT ACA TCC TGC TTG CCT TC           | 57.0                             | 210                    | (Ng et al., 2001)                                 |
|                  | tetA-R       | CAT AGA TCG CCG TGA AGA GG           |                                  |                        |                                                   |
| <i>tet(B)</i>    | tetB-F       | CTC AGT ATT CCA AGC CTT TG           | 56.0                             | 284                    | (Ng et al., 2001; Sengelov et al., 2003)          |
|                  | tetB-R       | GTA ATG GGC CAA TAA CAC CG           |                                  |                        |                                                   |
| <i>tet(G)</i>    | tetG-F       | CAG CTT TCG GAT TCT TAC GG           | 59.0                             | 169                    | (Ng et al., 2001)<br>(Szczepanowski et al., 2009) |
|                  | tetG-R       | CAA TGG TTG AGG CAG CTA CA           |                                  |                        |                                                   |
| <i>tet(M)</i>    | tetM-F       | GTG CCG CCA AAT CCT TTC TG           | 59.0                             | 250                    | (Vikram et al., 2017)                             |
|                  | tetM-R       | GCA TCC GAA AAT CTG CTG GG           |                                  |                        |                                                   |
| <i>tet(O)</i>    | tetO-F       | ACG GAR AGT TTA TTG TAT ACC          | 58.0                             | 170                    | (Aminov et al., 2001)                             |
|                  | tetO-R       | TGG CGT ATC TAT AAT GTT GAC          |                                  |                        |                                                   |
| <i>tet(Q)</i>    | tetQ-F       | AGA ATC TGC TGT TTG CCA GTG          | 59.0                             | 166                    | (Aminov et al., 2001)                             |
|                  | tetQ-R       | CGG AGT GTC AAT GAT ATT GCA          |                                  |                        |                                                   |
| <i>tet(W)</i>    | tetW-F       | GAG AGC CTG CTA TAT GCC AGC          | 59.0                             | 168                    | (Aminov et al., 2001)                             |
|                  | tetW-R       | GGG CGT ATC CAC AAT GTT AAC          |                                  |                        |                                                   |
| <i>erm(B)</i>    | ermB-F       | TCACCGAACACTAGGGTTGC                 | 60.0                             | 131                    | (Vikram et al., 2017)                             |
|                  | ermB-R       | CTGTGGTATGGCGGGTAAGT                 |                                  |                        |                                                   |

|             |           |                             |      |     |                                       |
|-------------|-----------|-----------------------------|------|-----|---------------------------------------|
| <i>mecA</i> | mecA-F    | GGGATCATAGCGTCATTATTC       | 55.0 | 527 | (Poulsen et al., 2003)                |
|             | mecA-R    | AACGATTGTGACACGATAGCC       |      |     |                                       |
| <i>mecC</i> | mecC-F    | GAAAAAAGGCTTAGAACGCCTC      | 60.0 | 138 | (Stegger et al., 2012)                |
|             | mecC-R    | GAAGATCTTTTCCGTTTTTCAGC     |      |     |                                       |
| <i>copB</i> | copB-F    | TAGTGGCCATGCACATCATC        | 60.0 | 201 | (Argudín et al., 2013)                |
|             | copB-R    | CCACCAGACAAGAACGGTTT        |      |     |                                       |
| <i>pcoA</i> | pcoA-F    | CGGGTATGCAAAGTCATCCT        | 55.0 | 136 | (Chalmers et al., 2018)               |
|             | RT-pcoA-R | TCCGCGTACGTGAGAACCTT        |      |     |                                       |
| <i>pcoD</i> | RP-pcoD-F | TATTGTCCTGCCTGCTGATG        | 55.0 | 126 | This study<br>(Chalmers et al., 2018) |
|             | pcoD-R    | GATGGGTCAGATCGCTCAGT        |      |     |                                       |
| <i>tcrB</i> | tcrB-F    | CATCACGGTAGCTTTAAGGAGATTTTC | 55.0 | 663 | (Hasman et al., 2006)                 |
|             | tcrB-R    | ATAGAGGACTCCGCCACCATTG-     |      |     |                                       |
| <i>czcC</i> | czcC-F    | TAGCCACGATCATAGTCATG        | 55.0 | 632 | (Cavaco et al., 2011)                 |
|             | czcC-R    | ATCCTTGTTTTCTTAGTGACTT      |      |     |                                       |

† Probe sequences each contained a 5' FAM fluorophore and 3' black hole quencher combination for use in probe-based 5' nuclease assays; probe concentration of 100nM; primer concentration of 600nM.

‡ T<sub>m</sub> (°C) is the annealing temperature at which the PCR assay was performed.

§ PCR product refers to the expected amplification product size in nucleotide base pairs (bp).

## References

- Aminov, R.I., Garrigues-Jeanjean, N., and Mackie, R.I. (2001). Molecular ecology of tetracycline resistance: development and validation of primers for detection of tetracycline resistance genes encoding ribosomal protection proteins. *Appl Environ Microbiol* 67(1), 22-32. doi: 10.1128/AEM.67.1.22-32.2001.
- Argudín, M.A., Cariou, N., Salandre, O., Le Guennec, J., Nemeghaire, S., and Butaye, P. (2013). Genotyping and antimicrobial resistance of *Staphylococcus aureus* isolates from diseased turkeys. *Avian pathology* 42(6), 572-580.
- Cavaco, L.M., Hasman, H., Aarestrup, F.M., Wagenaar, J.A., Graveland, H., Veldman, K., et al. (2011). Zinc resistance of *Staphylococcus aureus* of animal origin is strongly associated with methicillin resistance. *Veterinary microbiology* 150(3-4), 344-348.

- Chalmers, G., Rozas, K.M., Amachawadi, R.G., Scott, H.M., Norman, K.N., Nagaraja, T.G., et al. (2018). Distribution of the PCO gene cluster and associated genetic determinants among swine *Escherichia coli* from a controlled feeding trial. *Genes* 9(10), 504.
- Frahm, E., and Obst, U. (2003). Application of the fluorogenic probe technique (TaqMan PCR) to the detection of *Enterococcus* spp. and *Escherichia coli* in water samples. *J Microbiol Methods* 52(1), 123-131.
- Harms, G., Layton, A.C., Dionisi, H.M., Gregory, I.R., Garrett, V.M., Hawkins, S.A., et al. (2003). Real-time PCR quantification of nitrifying bacteria in a municipal wastewater treatment plant. *Environ Sci Technol* 37(2), 343-351.
- Hasman, H., Kempf, I., Chidaine, B., Cariolet, R., Ersbøll, A.K., Houe, H., et al. (2006). Copper resistance in *Enterococcus faecium*, mediated by the *tcrB* gene, is selected by supplementation of pig feed with copper sulfate. *Applied and Environmental Microbiology* 72(9), 5784-5789.
- Ng, L.K., Martin, I., Alfa, M., and Mulvey, M. (2001). Multiplex PCR for the detection of tetracycline resistant genes. *Mol Cell Probes* 15(4), 209-215. doi: 10.1006/mcpr.2001.0363.
- Poulsen, A.B., Skov, R., and Pallesen, L.V. (2003). Detection of methicillin resistance in coagulase-negative staphylococci and in staphylococci directly from simulated blood cultures using the EVIGENE MRSA Detection Kit. *Journal of Antimicrobial Chemotherapy* 51(2), 419-421.
- Sengelov, G., Halling-Sorensen, B., and Aarestrup, F.M. (2003). Susceptibility of *Escherichia coli* and *Enterococcus faecium* isolated from pigs and broiler chickens to tetracycline degradation products and distribution of tetracycline resistance determinants in *E. coli* from food animals. *Vet Microbiol* 95(1-2), 91-101.
- Stegger, á., Andersen, P., Kearns, A., Pichon, B., Holmes, M., Edwards, G., et al. (2012). Rapid detection, differentiation and typing of methicillin-resistant *Staphylococcus aureus* harbouring either *mecA* or the new *mecA* homologue *mecALGA251*. *Clinical Microbiology and Infection* 18(4), 395-400.
- Szczepanowski, R., Linke, B., Krahn, I., Gartemann, K.H., Gutzkow, T., Eichler, W., et al. (2009). Detection of 140 clinically relevant antibiotic-resistance genes in the plasmid metagenome of wastewater treatment plant bacteria showing reduced susceptibility to selected antibiotics. *Microbiology* 155(Pt 7), 2306-2319. doi: 10.1099/mic.0.028233-0.
- Vikram, A., Rovira, P., Agga, G.E., Arthur, T.M., Bosilevac, J.M., Wheeler, T.L., et al. (2017). Impact of "raised without antibiotics" beef cattle production practices on occurrences of antimicrobial resistance. *Appl Environ Microbiol* 83(22), e01682-01617. doi: 10.1128/AEM.01682-17.
