# Supplementary material for: Anaerobic Digestion of Tetracycline Spiked Livestock Manure and Poultry Litter Increased the Abundances of Antibiotic and Heavy Metal Resistance Genes
Source: PubMed Central journal article supplement (PMC7775313; doi:10.3389/fmicb.2020.614424), 2020-12-18
Supplement: Table_2.pdf [file Table_2.pdf]

Supplementary Table 2. Summary of the effects of anaerobic digestion of cattle and swine manure, and poultry litter.

| Measured outcome             | Digestion |           |              | Overall effect | Reference |
|------------------------------|-----------|-----------|--------------|----------------|-----------|
|                              | Cattle    | Swine     | Poultry      |                |           |
| Total bacteria               | Increased | Increased | Increased    | Increased      | Figure 1  |
| <i>E. coli</i>               | Increased | No effect | Increased    | Variable       | Figure 1  |
| <i>Enterococcus</i> spp.     | No effect | Increased | Increased    | Variable       | Figure 1  |
| <i>Staphylococcus aureus</i> | Increased | No effect | Increased    | Variable       | Figure 1  |
| <i>tet(A)</i>                | Increased | Increased | No effect    | Variable       | Figure 2  |
| <i>tet(B)</i>                | Increased | Increased | Increased    | Increased      | Figure 2  |
| <i>tet(G)</i>                | Increased | Increased | Increased    | Increased      | Figure 2  |
| <i>tet(M)</i>                | Increased | Increased | Increased    | Increased      | Figure 2  |
| <i>tet(O)</i>                | Increased | Increased | Increased    | Increased      | Figure 2  |
| <i>tet(Q)</i>                | Increased | Increased | Increased    | Increased      | Figure 2  |
| <i>tet(W)</i>                | No effect | No effect | Increased    | Variable       | Figure 2  |
| <i>erm(B)</i>                | No effect | Increased | Decreased    | Variable       | Figure 5  |
| <i>mecA</i>                  | Increased | No effect | Increased    | Variable       | Figure 5  |
| <i>mecC</i>                  | Increased | Increased | Increased    | Increased      | Figure 5  |
| <i>copB</i>                  | No effect | No effect | Not detected | No effect      | Text      |
| <i>pcoA</i>                  | No effect | No effect | No effect    | No effect      | Figure 6  |
| <i>pcoD</i>                  | Increased | Increased | No effect    | Variable       | Figure 6  |
| <i>trcB</i>                  | Increased | Increased | Increased    | Increased      | Figure 6  |
| <i>czrC</i>                  | No effect | Decreased | Increased    | Variable       | Figure 6  |
